# Supplementary material
Source: bioRxiv or medRxiv preprint supplement (http://medrxiv.stage.highwire.org/highwire/filestream/95053/field_highwire_adjunct_files/0/2020.08.26.20181719-1.pdf)

## **Appendix A: Sample pooling and testing protocol**

### **Protocol for pooling samples (4 samples per pool) – 96-well format**

This is ideally a two-person task: one person performing the pooling mechanics, and the other person managing the logistics of record keeping of which samples constitute each pool, formatting each set of four samples to be pooled, and presenting them to the pooling operator with a labelled 'pooling' tube.

1. Assemble 4x racks of samples to be pooled (usually 4x racks of 93 samples each)
2. Label a printed 96-well pooling log sheet and record the sample number range for each block.
3. Assign a 'pooled' block identification number for tracking.
4. Assemble 3x small racks to hold 4x samples to be pooled and 1x labelled tube to hold one pooled sample at a time. This allows for the person performing pooling to use one rack, and the person assembling the samples to pre-prepare the racks as required and deliver them to the person performing pooling. Tubes holding pooled samples must be labelled with a unique 'pool tube' identifier or barcode as you progress through the pooling exercise and this number/barcode must be recorded on the pool log sheet for each pool.
5. Place first 4 tubes to be pooled into small rack with labelled 'pool' tube 1.
6. Record the 4x lab numbers on the pooling log sheet for position A1 on the 96-well log-sheet.
7. Label position A1 as "pool 1"
8. Place rack in Biosafety cabinet (BSC) for the 'pooler' to vortex and then remove 200ul from each tube and place into 'pool tube 1'. This will contain 800uL on completion. Place pool tube 1 in the rack and remove from the cabinet.
9. Assemble the 'pool tubes' into a tray labelled with 'Pooled block identification number.
10. Assemble second group of 4x tubes, and continue steps 5-9 using different 'pooled sample number' as you proceed.
11. If an error occurs with the addition or mix-up of any samples, record the identity of the samples to the corresponding pool tube location on the 96-well log sheet. This will keep a record of what constitutes each pool.
12. Proceed until all samples are pooled.
13. On completion you will have 93 tubes containing pooled samples individually labelled with their 'pool tube' identifier. Alternatively, a subsequent barcode could be used to label and identify each tube instead of a number.
14. Proceed with testing as you would for a single-specimen samples. On completion of the testing, any pools that return a positive result must be de-pooled and tested as their 4 individual samples.

**Figure 1: Sample pooling workflow – 96-well format**

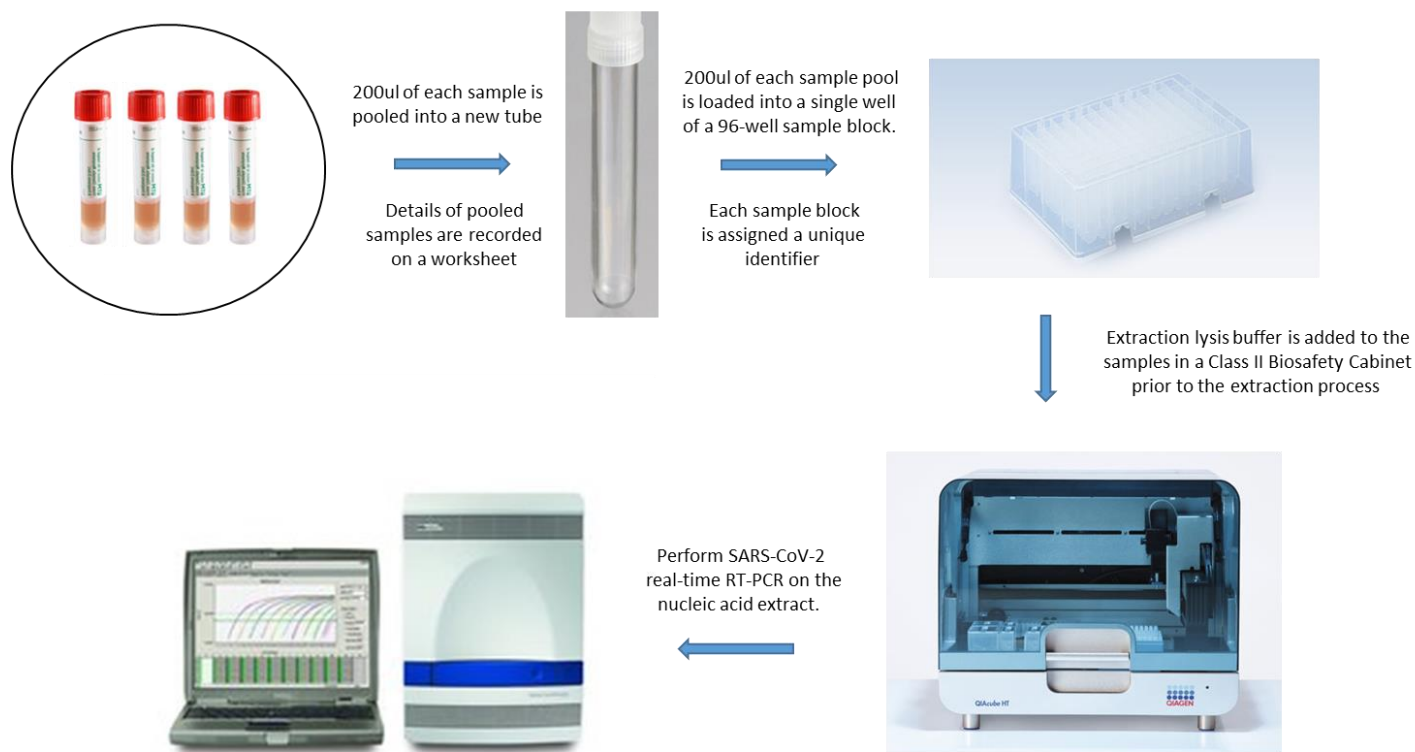

**Figure 2: Sample de-pooling workflow – 96-well format**

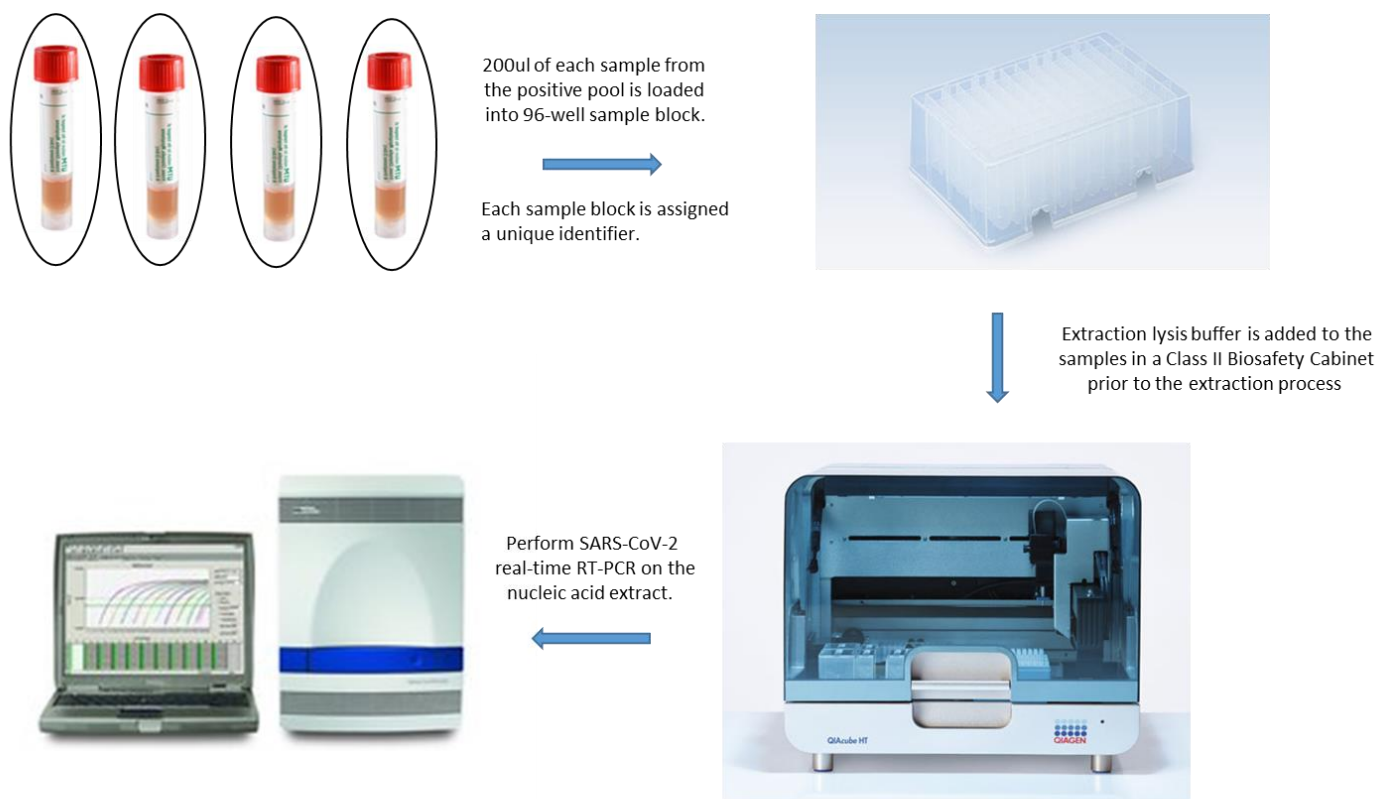

**Pooled Block Extraction number: PBE**

**Protocol for Pooling samples (4 samples per pool) – format for pools being extracted individually or using continuous flow devices.**

This is ideally a two-person task, one person performing the pooling mechanics and the other person managing the logistics of record keeping of what constitutes each pool, formatting each set of 4 samples to be pooled and presenting them to the pooling operator with a labelled 'pooling' tube.

1. Assemble samples to be pooled
2. Label a printed pooling log-sheet and record the sample number range for page (1st number to last number).
3. Assemble 3x small racks to hold 4x samples to be pooled and 1x tube to hold pooled sample. Tubes holding pooled samples will need to be labelled as you progress through the pooling exercise.
4. Place first 4 tubes to be pooled into small rack and labelled 'pool 1'.
5. Record the 4x lab numbers on the pooling log sheet for 'Pool 1'.
6. Place rack in Biosafety cabinet for the Pooler to vortex and then remove 200ul from each tube and place into 'pool tube 1'. This will contain 800uL on completion. Place pool tube 1 in the rack and remove from the cabinet.
7. Assemble the 'pool tubes' into a tray labelled with identification number.
8. Assemble second group of 4x tubes, and continue steps 5-9 using different 'pooled sample number' as you proceed.
9. If an error occurs with the addition or mix-up of any samples, record the identity of the samples to the corresponding pool tube location on the log sheet. This will keep a record of what constitutes each pool.
10. Proceed until all samples are pooled.
11. On completion you will have X number of pooled samples. These tubes should be individually labelled with their 'pool tube' identifier or have a barcode identifier affixed to them. Either identifier must be recorded on your 'pooled log sheet'.
12. Proceed with testing as you would from normal samples. On completion of the testing, any pools that return a positive result must be de-pooled and tested as their 4 individual samples.

Figure 4: Sample pooling workflow – individual or continuous flow

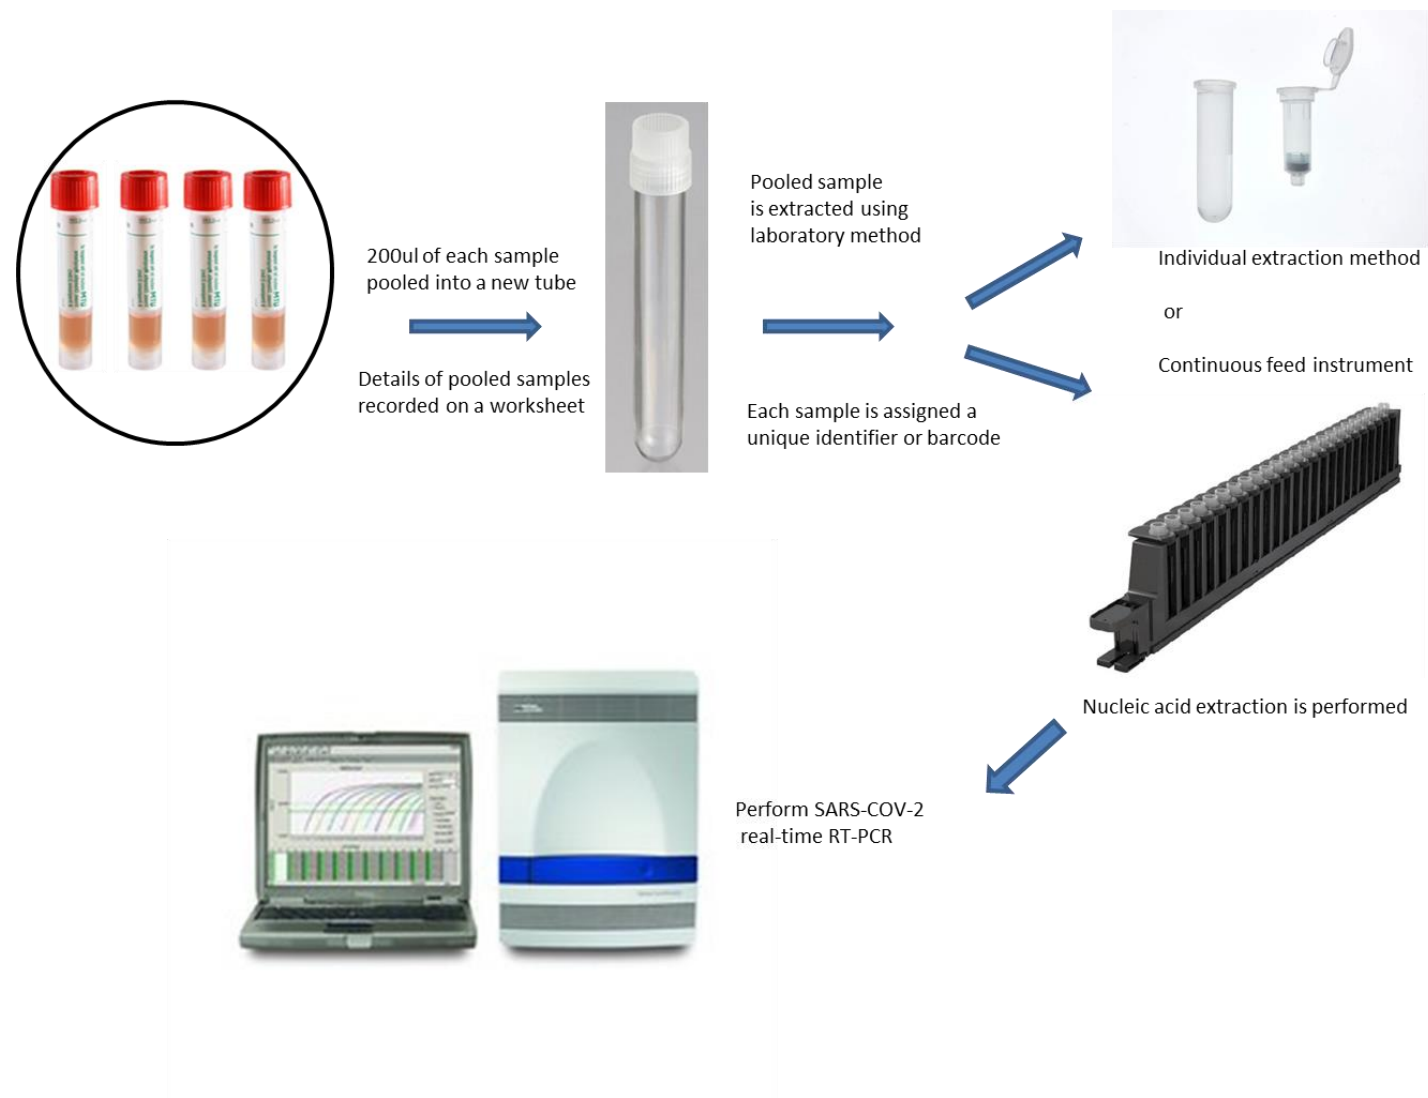

Supplement: Supplementary file [file 2020.08.26.20181719-1.pdf]
